# Supplementary material
Source: PubMed Central journal article supplement (PMC4190628)
Supplement: ml500231b_si_001.pdf [file ml500231b_si_001.pdf]

**Table 1** Data collection and processing

Values for the outer shell are given in parentheses.

---

|                                                             |                                  |
|-------------------------------------------------------------|----------------------------------|
| Diffraction source                                          | Rotating anode                   |
| Wavelength (Å)                                              | 1.5418                           |
| Temperature (K)                                             | 100                              |
| Detector                                                    | CCD Saturn                       |
| Crystal-detector distance (mm)                              | 45 mm                            |
| Rotation range per image (°)                                | 1                                |
| Total rotation range (°)                                    | 56                               |
| Exposure time per image (s)                                 | 5                                |
| Space group                                                 | P4 <sub>3</sub> 2 <sub>1</sub> 2 |
| <i>a</i> = <i>b</i> , <i>c</i> (Å)                          | 76.979, 38.089                   |
| Mosaicity (°)                                               | 0.8                              |
| Resolution range (Å)                                        | 50.0 – 1.80 (1.83 – 1.80)        |
| Total No. of reflections                                    | 31609                            |
| No. of unique reflections                                   | 10554                            |
| Completeness (%)                                            | 94.7 (85.1)                      |
| Redundancy                                                  | 3.0 (1.8)                        |
| $\langle I/\sigma(I) \rangle$                               | 32.0 (2.7)                       |
| $R_{\text{merge}}$                                          | 4.8 (37.1)                       |
| Overall <i>B</i> -factor from Wilson plot (Å <sup>2</sup> ) | 38.2                             |

---

**Table 2** Structure solution and refinement

Values for the outer shell are given in parentheses.

---

|                                        |            |
|----------------------------------------|------------|
| Resolution range (Å)                   | 25.55-1.80 |
| Completeness (%)                       | 94.4       |
| $\sigma$ cutoff                        | 0          |
| No. of reflections, working set        | 9988       |
| No. of reflections, test set           | 499        |
| Final $R_{\text{cryst}}$               | 18.1       |
| Final $R_{\text{free}}$                | 24.4       |
| Cruickshank DPI                        | 0.175      |
| No. of non-H atoms                     | 1235       |
| Protein                                | 1087       |
| Ion                                    | 1          |
| Ligand                                 | 39         |
| R.m.s. deviations                      |            |
| Bonds (Å)                              | 0.017      |
| Angles (°)                             | 1.67       |
| Average $B$ -factors (Å <sup>2</sup> ) |            |
| All atoms                              | 31.2       |
| Au+ Ion                                | 44.9*      |
| Ramachandran plot                      |            |
| Most favoured (%)                      | 95.4       |
| Allowed (%)                            | 4.6        |

---

\*occupancy of Au+ ion 0.6, the occupancy factor has been evaluated on the basis of the observation of the residual positive and negative peaks in the Fo-Fc electron density maps
